# Supplementary material for: Autophagy Inhibits Intercellular Transport of Citrus Leaf Blotch Virus by Targeting Viral Movement Protein
Source: MDPI journal article supplement (doi:10.3390/v13112189), 2021-10-30
Supplement: s1 [file s1]

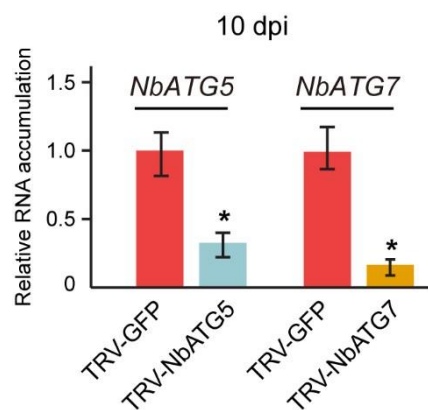

**Figure S1.** Relative mRNA accumulation of *NbATG5* and *NbATG7* following silencing using TRV-VIGS. Total RNAs were extracted from the upper leaves at 10 dpi. qRT-PCR was carried out using primer sets specific for *NbATG5*, *NbATG7* and *N. benthamiana* 18S rRNA as an internal control standard. The TRV-GFP sample was set to a value of 1.0. The asterisk indicates a significant difference ( $P < 0.05$ , Student's *t*test).

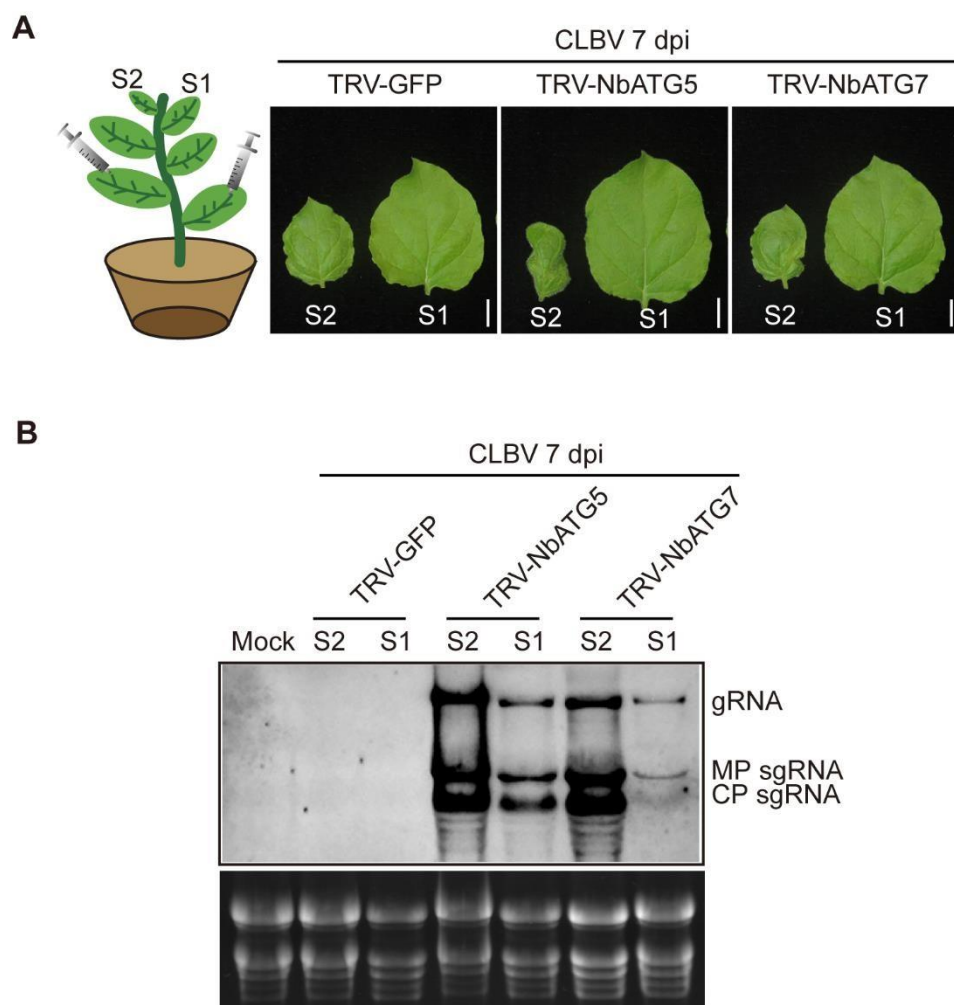

**Figure S2.** Effect of autophagy on CLBV systemic infection in *N. benthamiana*. **(A)** CLBV symptom expressions at 7 dpi on leaves of plants with *NbATG5* and *NbATG7* genes had been silenced using TRV-VIGS. Plants were inoculated with TRV-NbATG5 and TRV-NbATG7 or TRV-GFP as a control, and 10 days later, plants were inoculated with CLBV. The photographs show the upper two leaves as illustrated in the cartoon image in the left side of the panel. Scale bars, 1 cm. **(B)** CLBV RNA accumulation in infected plant at 7 dpi. Total RNAs were extracted from upper leaves

described in (A) and subjected to RNA blotting with a probe specific for CLBV genome. Ethidium bromide-stained 28S rRNA is shown as a loading control.

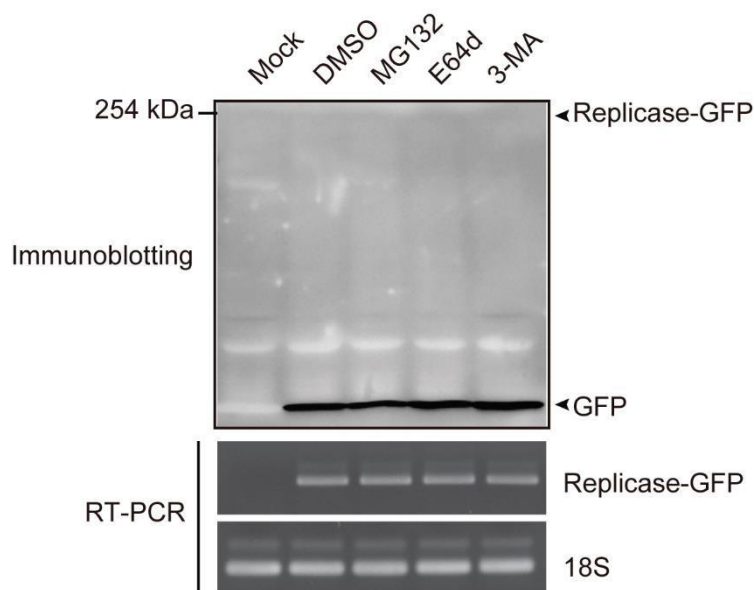

**Figure S3.** Protein and mRNA accumulations of transiently expressed. Replicase-GFP upon treatment with MG132, E64d and 3-MA.

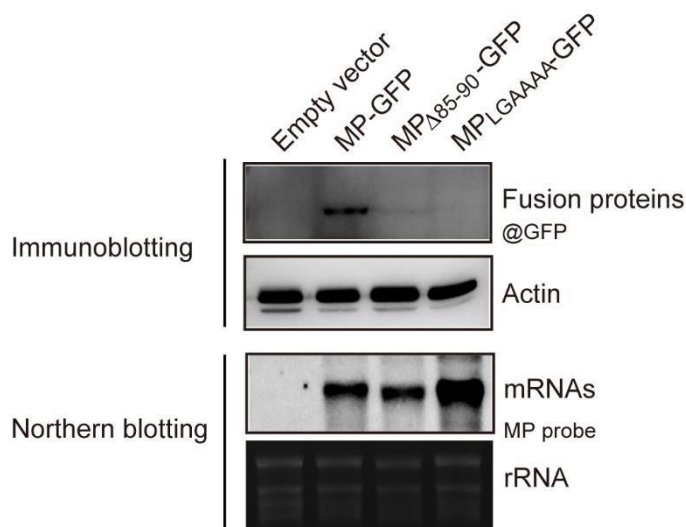

**Figure S4.** Protein and mRNA accumulations of transiently expressed CLBV MP with mutation in the AIM sequence fused with GFP.

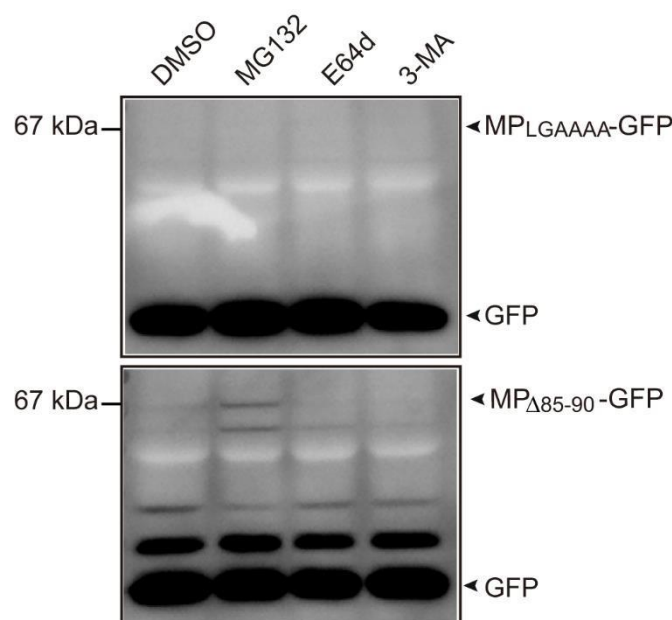

**Figure S5.** Protein accumulation of transiently expressed CLBVP MP with mutation in the AIM sequence fused with GFP upon treatment with MG132, E64d and 3-MA.

**Supplementary Table S1.** A list of primers used in this study.

**Primers used for construction of clbv infectious clone.**

| Clone Name | Primer Name      | Oligonucleotide Sequence (5'–3')                                                                                                            |
|------------|------------------|---------------------------------------------------------------------------------------------------------------------------------------------|
| pCLBV      | F-pCass-CLBV     | agaggcctgggtaccGAAAACGAAAGAAACCTACA<br>GGTCGGACCGCGAGGAGGTGGA-<br>GATGCCATGCCGACCTTTTTTTT<br>TTTTTTTTTTTTTTTTTTTTTTC                        |
|            | R-CLBV           | accgaattcgagctcCTTAGCCATCCGAGTGGAC-<br>GTCCTCCTTCGGATGCC CAGGTCGGACCGCGAG-<br>GAGGT                                                         |
|            | R-pCass-RZ       | cttgaattacatggagtcgacCTTAGGGAGGAGCGCTCTG-<br>TAG                                                                                            |
| pCLBV-GFP  | F-pCass-CLBV6526 | CTTAACATGGGACACATAATCCTTCTTACATCTC-<br>TATGAGCTTAGC TTTATTTTT<br>GAAGGAT-                                                                   |
|            | R-pCass-CLBV8261 | TATGTGTCCCATGTTAAGTCTGAAACTGCGTCTTT<br>GAA                                                                                                  |
|            | F-CLBV-GFP       | AAGAAGTCAGAGTGGAAGAGATTGGGG-<br>CAATGATCGATTAAGAA<br>AGTATGGTGAGCAAGGGCGAGGAGCTG<br>GGCCCGCCCTTCCACCCACGCCAGTTCATT-<br>GTACAGCTCGTCCA TGCCG |
|            | R-CLBV-GFP       | ACTGGCGTGGGTGGAAGGGCGGGCC<br>tgtcaaacactgatagtttaaacTGAAGGCGGGAAAC-<br>GACAATCTGA                                                           |
|            | F-pCass-CLBV-3T  |                                                                                                                                             |
|            | R-pCass-CLBV-3T  |                                                                                                                                             |

**Primers used for transient expression in *N. benthamiana***

|                            |                              |                                                       |
|----------------------------|------------------------------|-------------------------------------------------------|
| pCambia1302-Replicase -GFP | F <sub>spel</sub> -Replicase | accatggtagatctgactagtATGGCTTT-<br>GATGAGCAACAAAACCTGC |
|                            | R <sub>spel</sub> -Replicase | gctcaccatcctaggactagtAA-<br>TATCTTCGTCTGAAGACTGTTC    |

|                                 |                           |                                                                                                |
|---------------------------------|---------------------------|------------------------------------------------------------------------------------------------|
| pCambia1302-MP-GFP              | F <sub>speI</sub> -MP     | accatggtagatctgactag-<br>tATGGCTTCCCTCATCAATGTGA<br>GC                                         |
|                                 | R <sub>speI</sub> -MP     | gctcaccatcctaggactagtCTT-<br>GGTCCCAGTGTGCTGGC                                                 |
| pCambia1302-MP-dAIM-GFP         | F <sub>speI</sub> -MP     | accatggtagatctgactag-<br>tATGGCTTCCCTCATCAATGTGA<br>GC                                         |
|                                 | R-MP <sub>dAIM</sub>      | GTGCAAGTAAGCAGCCTCTTTTC<br>GAAAAGAGGCTGCTTACTT-<br>GCACATAGCAATTAGATCATT-<br>GCTGC             |
|                                 | F-MP <sub>dAIM</sub>      | CG                                                                                             |
|                                 | R <sub>speI</sub> -MP     | gctcaccatcctaggactagtCTT-<br>GGTCCCAGTGTGCTGGC                                                 |
| pCambia1302-MP- <i>aim</i> -GFP | F <sub>speI</sub> -MP     | accatggtagatctgactag-<br>tATGGCTTCCCTCATCAATGTGAG<br>C                                         |
|                                 | R-MP- <i>aim</i>          | ATCTAATTGC-<br>TATTATTATTATTATAAGGTG-<br>CAAGTAAGCAGCCTC<br>TTTT                               |
|                                 | F-MP- <i>aim</i>          | CACCTTATAATAATAATAA-<br>TAGCAATTAGATCATTGCTGCCG                                                |
|                                 | R <sub>speI</sub> -MP     | gctcaccatcctaggactagtCTT-<br>GGTCCCAGTGTGCTGGC                                                 |
| pCambia1302-CP-GFP              | F <sub>speI</sub> -CP     | accatggtagatctgactag-<br>tATGAAAATCAC-<br>CAATGACAATGCC                                        |
|                                 | R <sub>speI</sub> -CP     | gctcaccatcctaggactagtCATCTC-<br>TATGAGCTTAGCTTTATTTTT                                          |
| pBin41-MP-HA                    | F <sub>Bam</sub> HI-MP    | agcttcgactctagaggatccAC-<br>CATGGCTTCCCTCATCAATGTGA<br>GC                                      |
|                                 | R <sub>Bam</sub> HI-MP-HA | ttcgagctcgcccggggatccTCAAGCG-<br>TAATCTGGAACATCGTATGGG-<br>TACT TGGTCCCAGTGTGCTGGC             |
| pBin41-CP-HA                    | F <sub>Bam</sub> HI-CP    | agcttcgactctagaggatccAC-<br>CATGAAAATCAC-<br>CAATGACAATGCC                                     |
|                                 | R <sub>Bam</sub> HI-CP-HA | ttcgagctcgcccggggatccTCAAGCG-<br>TAATCTGGAACATCGTATGGG-<br>TACA TCTC-<br>TATGAGCTTAGCTTTATTTTT |

|                        |                              |                                                    |
|------------------------|------------------------------|----------------------------------------------------|
| pBI121-MP-mCherry      | F <sub>Bam</sub> HI-MP       | cacgggggactctagag-gatccATGGCTTCCCTCATCAATGTGAGC    |
|                        | R <sub>Bam</sub> HI-MP       | tcaccatggtacccggggatccCTT-GGTCCCAGTGTCTGCTGGC      |
| pBI121-CP-mCherry      | F <sub>Bam</sub> HI-CP       | cacgggggactctagag-gatccATGAAAATCAC-CAATGACAATGCC   |
|                        | R <sub>Bam</sub> HI-CP       | tcaccatggtacccggggatccCATCTC-TATGAGCTTAGCTTTATTTTT |
| pBin61-GFP-NbATG8c1    | F <sub>Bam</sub> HI-NbATG8c1 | acccccgggggtcgacggatccATGGCGAA-GAGTTCTTTCAAACCTT   |
|                        | R <sub>Bam</sub> HI-NbATG8c1 | tctagttcatctagaggatccTTAATT-GCCGAGCTCAAGAAACC      |
| pBin61-GFP-NbATG8d     | F <sub>Bam</sub> HI-NbATG8d  | acccccgggggtcgac-ggatccATGGCCGAAGCTGCTCGT          |
|                        | R <sub>Bam</sub> HI-NbATG8d  | tctagttcatctagaggatccTCAAGATTT-GCAGAGAGAAAGCTG     |
| pBin61-GFP-NbATG8f     | F <sub>Bam</sub> HI-NbATG8f  | acccccgggggtcgacggatccATGGCAAAGAGTTCAATCAAGCA      |
|                        | R <sub>Bam</sub> HI-NbATG8f  | tctagttcatctagaggatccTCACAC-CAAGTTAAAGTCCCCAAATG   |
| pBin61-GFP-NbATG8i     | F <sub>Bam</sub> HI-NbATG8i  | acccccgggggtcgacggatccATGGG-GAAGGCTTTCAAAAAA       |
|                        | R <sub>Bam</sub> HI-NbATG8i  | tctagttcatctagaggatccTCAACTATTT-GCACGACCAAAGG      |
| pBin61-eYFP-N-NbATG8c1 | F <sub>Bam</sub> HI-NbATG8c1 | cgccacaacatcgaggatccAC-CATGGCGAAGAG-TTCTTTCAAACCTT |
|                        | R <sub>Sma</sub> I-NbATG8c1  | gaattcgagctctatccgggTTAATT-GCCGAGCTCAAGAAACC       |
| pBin61-eYFP-N-NbATG8d  | F <sub>Bam</sub> HI-NbATG8d  | acccccgggggtcgac-ggatccATGGCCGAAGCTGCTCGT          |
|                        | R <sub>Sma</sub> I-NbATG8d   | tctagttcatctagaggatccTCAAGATTT-GCAGAGAGAAAGCTG     |
| pBin61-eYFP-N-NbATG8f  | F <sub>Bam</sub> HI-NbATG8f  | acccccgggggtcgacggatccATGGCAAAGAGTTCAATCAAGCA      |
|                        | R <sub>Sma</sub> I-NbATG8f   | tctagttcatctagaggatccTCACAC-CAAGTTAAAGTCCCCAAATG   |
| pBin61-eYFP-N-NbATG8i  | F <sub>Bam</sub> HI-NbATG8i  | acccccgggggtcgacggatccATGGG-GAAGGCTTTCAAAAAA       |
|                        | R <sub>Sma</sub> I-NbATG8i   | tctagttcatctagaggatccTCAACTATTT-GCACGACCAAAGG      |

|                                              |                                     |                                                           |
|----------------------------------------------|-------------------------------------|-----------------------------------------------------------|
| pBin61-eYFP-C-MP                             | F <sub>Bam</sub> HI-MP/-N/-N84/-N90 | gacgagctgtacaagggatccAC-CATGGCTTCCCTCATCAATGTGAGC         |
|                                              | R <sub>Sma</sub> I-MP/-C            | gaattcgagctctatcccgggTCACTT-GGTCCCAGTGTCTGCTGGC           |
| pBin61-eYFP-C-MP-N                           | R <sub>Sma</sub> I-MP-N             | gaattcgagctctatcccgggTCATAGAC-CTGTAATTATGGCAGCTACAGA      |
| pBin61-eYFP-C-MP-C                           | F <sub>Bam</sub> HI-MP-C            | gacgagctgtacaagggatccACCATGAC-CTGTACACCCACCAACAAAAT       |
| pBin61-eYFP-C-MP-N84                         | R <sub>Sma</sub> I-MP-N84           | gaattcgagctctatcccgggTCAGTG-CAAGTAAGCAGCCTCTTTTCCG        |
| pBin61-eYFP-C-MP-N90                         | R <sub>Sma</sub> I-MP-N90           | gaattcgagctc-tatcccgggTCATATTGGAACAAATC<br>CAAGGTGCAAGTAA |
| <b>Primers used for bacterial expression</b> |                                     |                                                           |
| pMAL-MBP-MP                                  | F <sub>Xba</sub> I-MP/-N            | tcagaattcggatcctcta-gaATGGCTTCCCTCATCAATGTGAGC            |
|                                              | R <sub>Hind</sub> III-MP/-C         | acgacggccagtgcgaagcttTCACTT-GGTCCCAGTGTCTGCTGGC           |
| pMAL-MBP-MP-N                                | R <sub>Hind</sub> III-MP-N          | acgacggccagtgcgaagcttTCATAGAC-CTGTAATTATGGCAGCTACAGA      |
| pMAL-MBP-MP-C                                | F <sub>Xba</sub> I-MP-C             | tcagaattcggatcctctagaATGACCTG-TACACCCACCAACAAAAT          |
| <b>Primers used for VIGs</b>                 |                                     |                                                           |
| pTRV-ATG5                                    | F <sub>Bam</sub> HI-NbATG5          | gtgagctcgggtaccgatccATGG-GAAGTAAAGGGGCAGGAG               |
|                                              | R <sub>Eco</sub> RI-NbATG5          | tgagtaagggtaccgaattcAC-GTTCAGGTTCTGCACAAAGAAG             |
| pTRV-ATG7                                    | F <sub>Bam</sub> HI-NbATG7          | gtgagctcgggtaccgatccATGGCGGA-TAGTGGAAGAGGAAC              |
|                                              | R <sub>Eco</sub> RI-NbATG7          | tgagtaagggtaccgaattcCAACGTGTTT-GTATTGAGAAGA               |
| <b>Primers used for RT-PCR</b>               |                                     |                                                           |
|                                              | F-CLBV CP-RT                        | ATGAAAATCAC-CAATGACAATGCC                                 |
|                                              | R-CLBV CP-RT                        | TTACATCTCTATGAGCTTAGC                                     |
|                                              | F-TRV CP-RT                         | GGTCCGATACGTCCTAATCCC                                     |
|                                              | R-TRV CP-RT                         | CCTAAGTAATTCGTGCATTGCG                                    |
| <b>Primers used for RT-qPCR</b>              |                                     |                                                           |
|                                              | F-NbATG5-RT                         | GAA-GCTTATCTCCGAATCTCGTCTAAGC                             |

|                                       |              |                                     |
|---------------------------------------|--------------|-------------------------------------|
|                                       | R-NbATG5-RT  | CCAAC TTTCAACTGCAGGTG-<br>CATCTTG   |
|                                       | F-NbATG7-RT  | AGGTCTCGATGTCTAATCCTC-<br>TACGCCAG  |
|                                       | R-NbATG7-RT  | AATCAAATCAGACAAATGTCTG-<br>CAATCCTG |
|                                       | F-CLBV-RT    | AGCTGAGGCAGAGGATTTGA                |
|                                       | R-CLBV-RT    | GAACTGCTGCAAATCGTTCA                |
|                                       | F-18SrRNA-RT | CGGCTACCACATCCAAGGAAGG              |
|                                       | R-18SrRNA-RT | GAGCTGGAATTACCGCGGCTG               |
| <b>Primers used for Northern blot</b> |              |                                     |
|                                       | F-MP         | ACCTGTACACCCACCAACAA                |
|                                       | R-MP         | TTGCCCCAATCTCTTCCACT                |
|                                       | F-CWMV-3T    | GCAGGGATTGACTCGTTGAT                |
|                                       | R-CWMV-3T    | CGACTGCTTGACTAACACCC                |
